# Supplementary material for: Specificity and catalysis hardwired at the RNA–protein interface in a translational proofreading enzyme
Source: PubMed Central journal article supplement (PMC4491819; doi:10.1038/ncomms8552), 2015-06-26
Supplement: ncomms8552-s1.pdf [file ncomms8552-s1.pdf]

## Supplementary information

### Supplementary figures

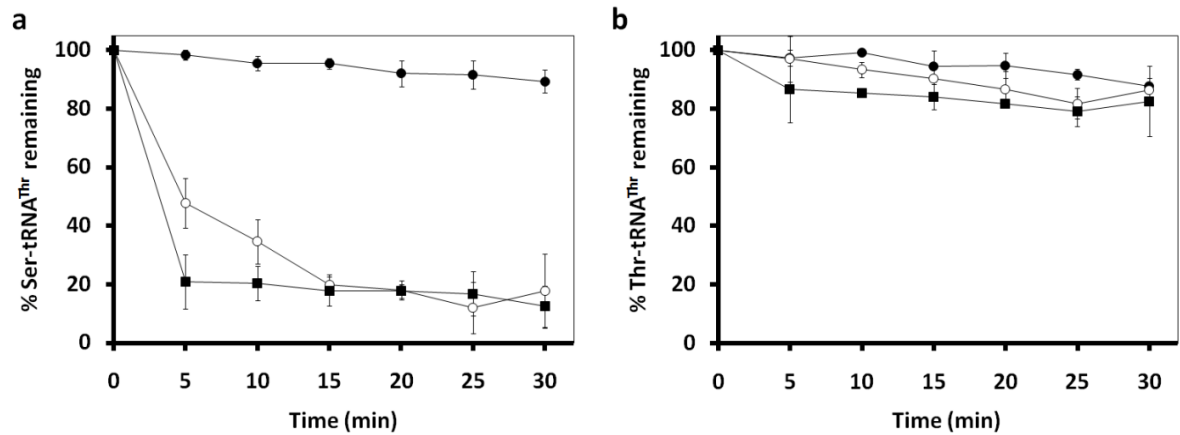

**Supplementary figure 1.** Deacylation of (a) L-Ser-(Ec)tRNA<sup>Thr</sup> and (b) L-Thr-(Ec)tRNA<sup>Thr</sup> by buffer (closed circles), PfuNTD wild type (open circles) and PfuNTD Y120A/E134A (closed squares). The error bars indicate standard deviation of three independent experiments.

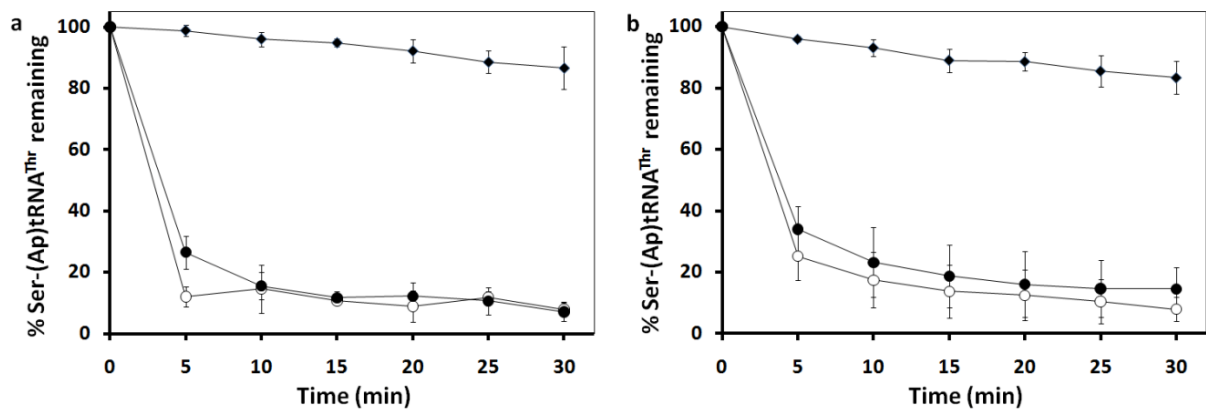

**Supplementary figure 2.** (a) Deacylation of 0.2 μM L-Ser-(Ap)tRNA<sup>Thr</sup> by buffer (closed diamond), 1.5 μM ApThrRS-2 wild type (open circle) and 1.5 μM ApThrRS-2 Y115A/E129A (closed circle). (b) Deacylation of 0.2 μM L-Ser-(Ap)tRNA<sup>Thr</sup> by buffer (closed diamond), 1.5 μM PabNTD wild type (open circle) and 1.5 μM PabNTD Y120A/E134A (closed circle). The error bars indicate standard deviation of three independent experiments.

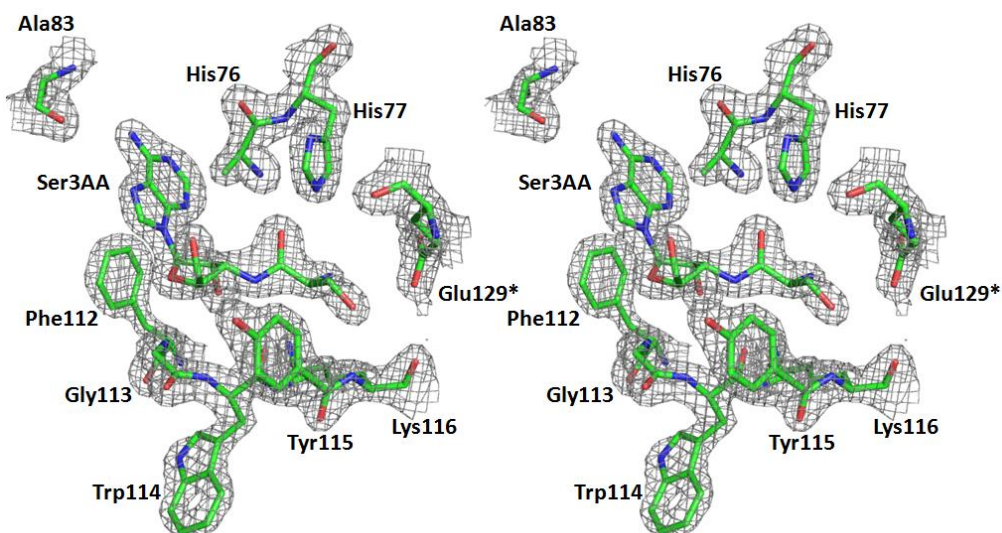

**Supplementary figure 3.** Stereoscopic representation of a portion of ApNTD+L-Ser3AA structure showing  $2F_o-F_c$  electron density map contoured at  $1.5\sigma$ .

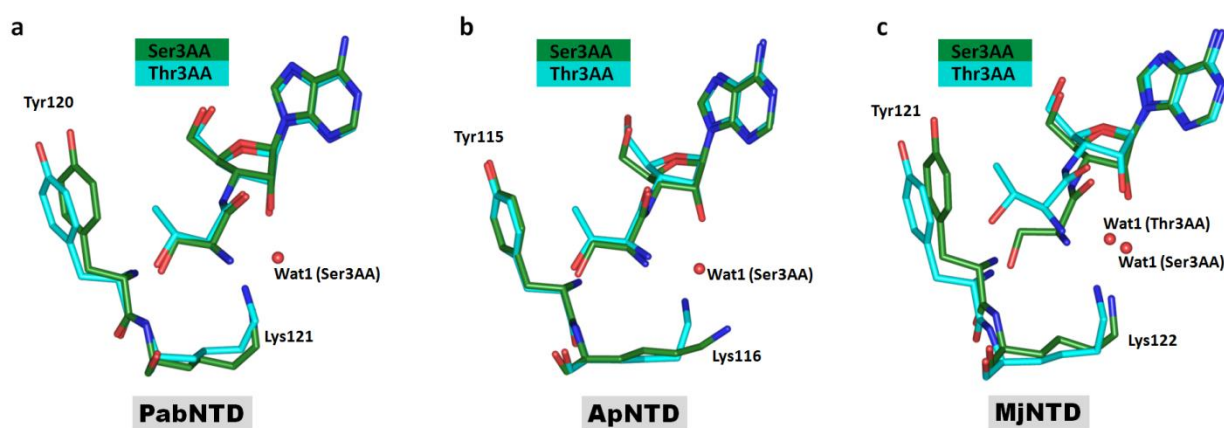

**Supplementary figure 4.** Superimposition of L-Ser3AA- (green) and L-Thr3AA-bound (cyan) structures in (a) PabNTD (b) ApNTD and (c) MjNTD. The proposed cognate rejection mechanism based on PabNTD structures had implicated the repositioning of Tyr120 side chain upon accommodation of extra  $\gamma$ -methyl group of threonine and a concomitant movement of adjacent Lys121 leading to steric exclusion of putative catalytic water Wat1<sup>1</sup>.

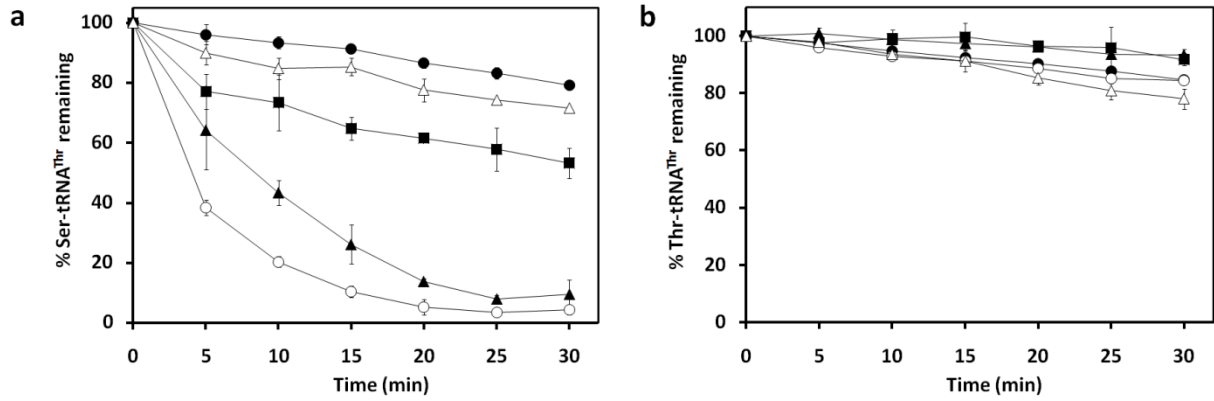

**Supplementary figure 5.** Deacylation of **(a)** L-Ser-(Ec)tRNA<sup>Thr</sup> and **(b)** L-Thr-(Ec)tRNA<sup>Thr</sup> by buffer (closed circles), MjNTD wild type (open circles), Y121A (closed triangles), E135A (open triangles) and Y121A/E135A (closed squares). The error bars indicate standard deviation of three independent experiments.

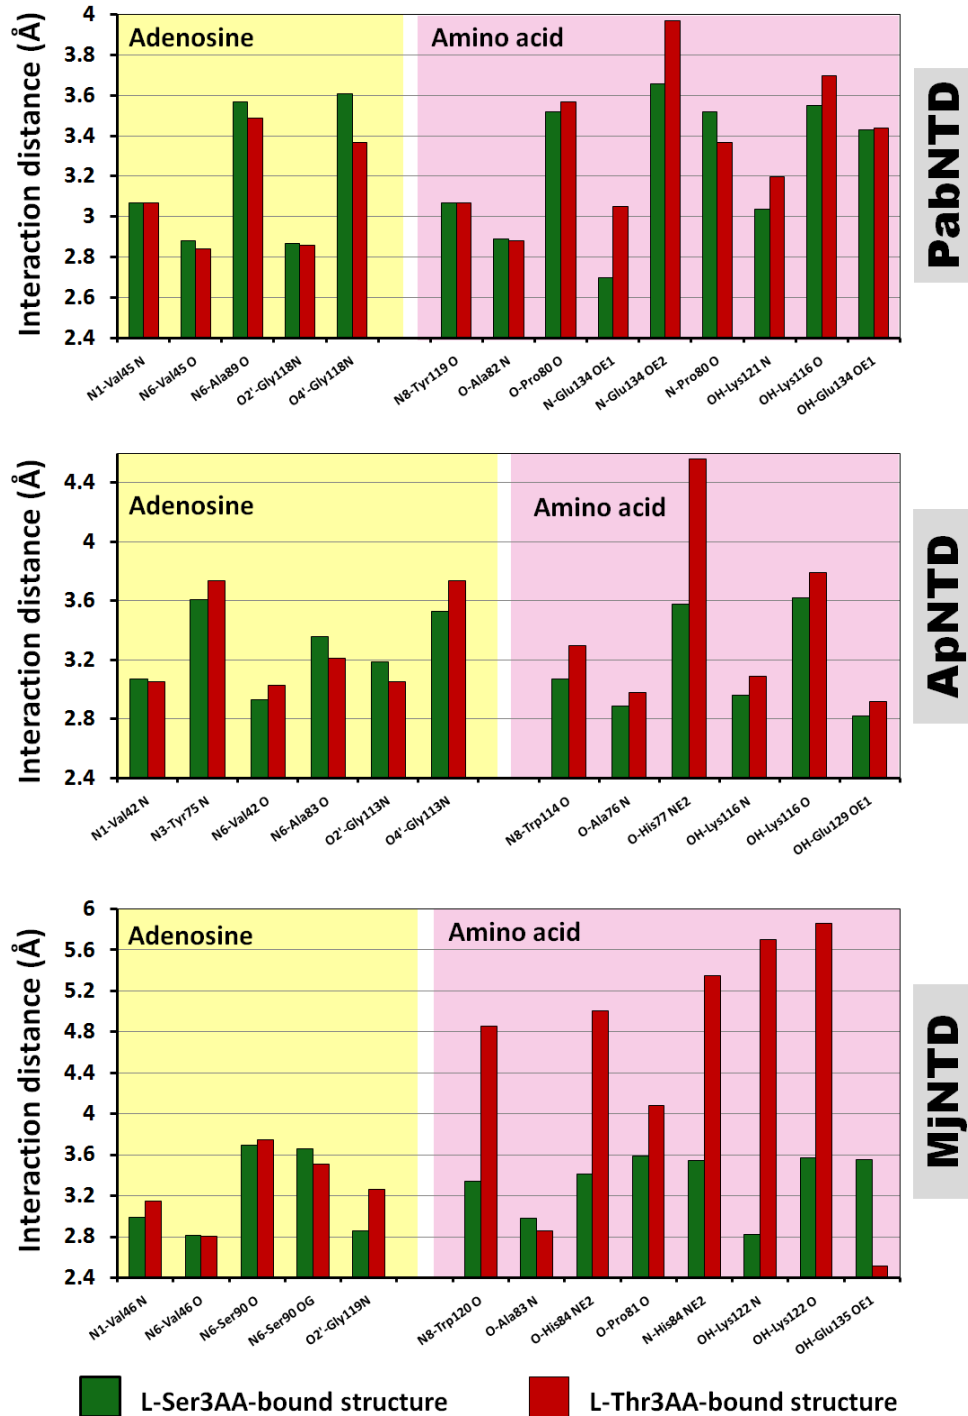

**Supplementary figure 6.** Interaction distances of the ligand in the pocket. Interactions of L-Ser3AA atoms are represented by green bars and that of L-Thr3AA atoms by red bars. The atoms belonging to adenosine moiety are in the yellow region while the atoms from amino acid moiety are in the pink region.

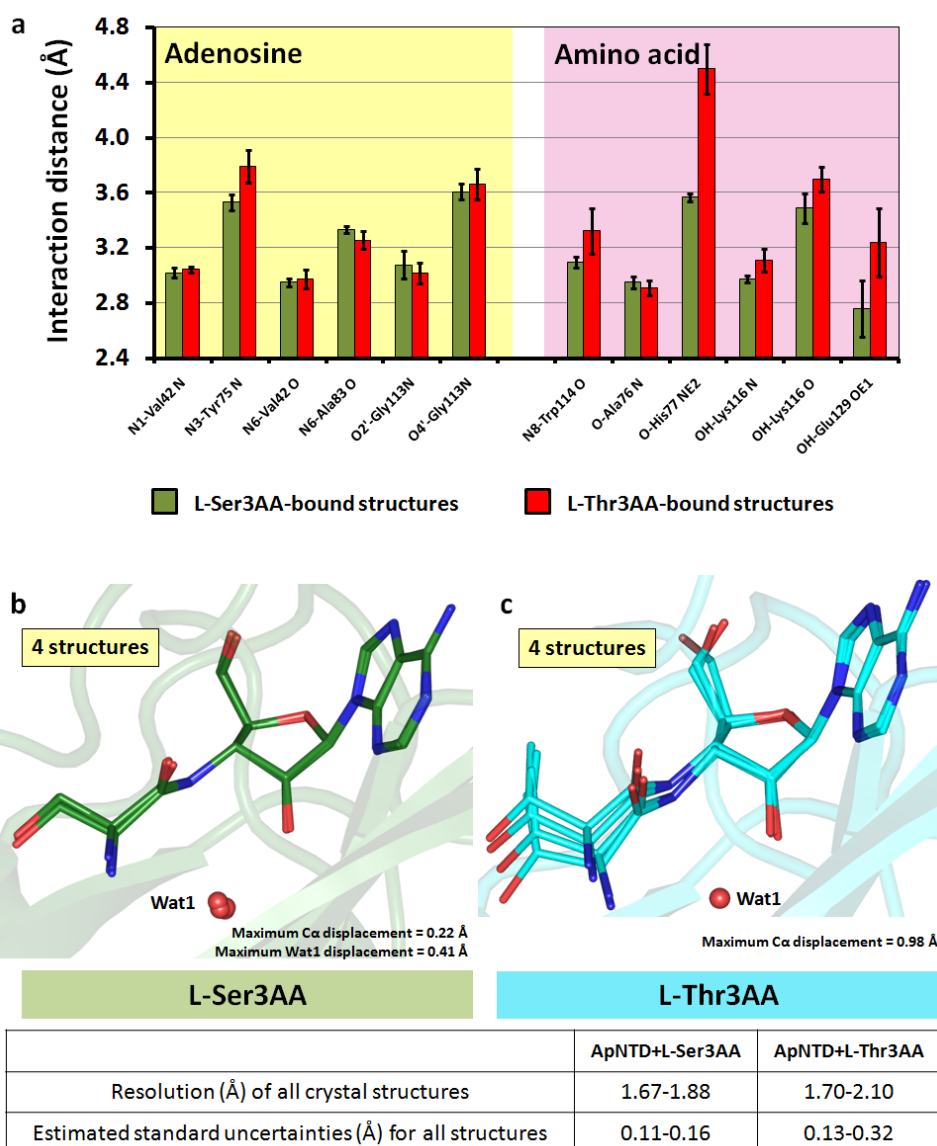

**Supplementary figure 7.** (a) The average interaction distance of ligand atoms in multiple crystal structures of ApNTD. L-Ser3AA atoms are represented in green bars and L-Thr3AA atoms in red bars. The atoms belonging to adenosine moiety are in the yellow region while the atoms from amino acid moiety are in the pink region. The L-Thr3AA-bound structures show a general loosening of interactions of the aminoacyl moiety compared to L-Ser3AA-bound structures. Overlap of 4 crystal structures of ApNTD in complex with (b) L-Ser3AA and (c) L-Thr3AA. The maximum displacement in C $\alpha$  of L-Ser3AA and Wat1 are 0.22 Å and 0.41 Å respectively in L-Ser3AA-bound structures. In L-Thr3AA-bound structures, the maximum displacement in C $\alpha$  of L-Thr3AA is 0.98 Å while Wat1 is observed in only one structure.

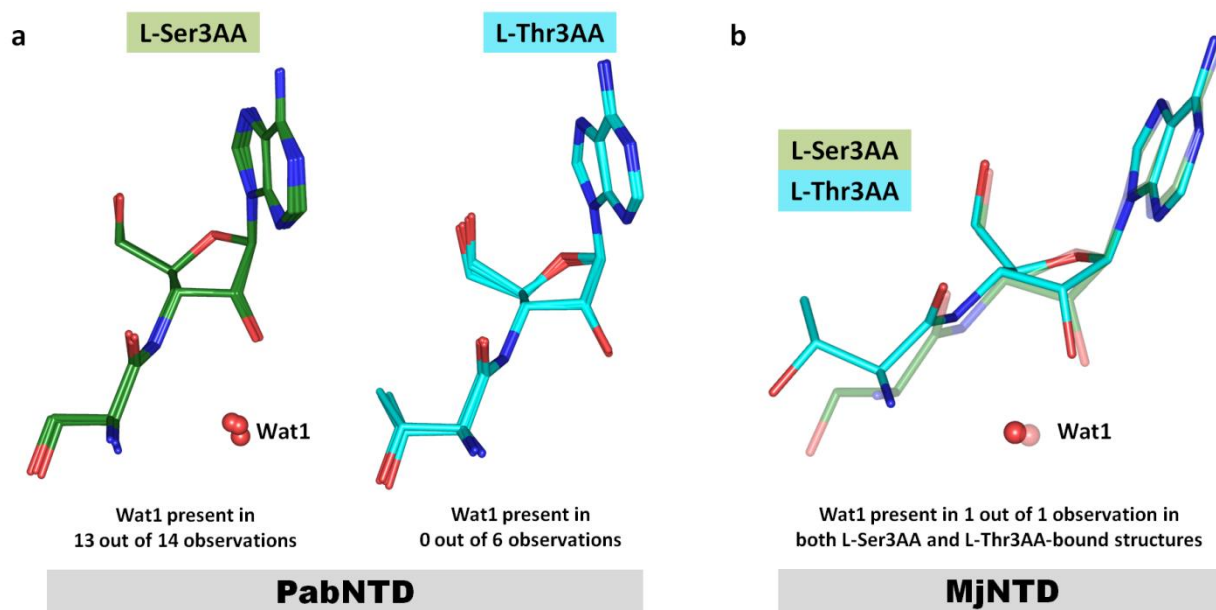

**Supplementary figure 8.** (a) Overlap of L-Ser3AA-bound structures (green) and L-Thr3AA-bound structures (cyan) of PabNTD. Both L-Ser3AA and L-Thr3AA are rigidly fixed without any significant deviation. Wat1 is present in 13 out of 14 observations of L-Ser3AA and 0 out of 6 observations of L-Thr3AA. (b) Overlap of L-Ser3AA-bound structures (green and transparent) and L-Thr3AA-bound structures (cyan) of MjNTD. While Wat1 is present in both structures, there is a significant repositioning of the threonyl moiety with respect to the seryl moiety.

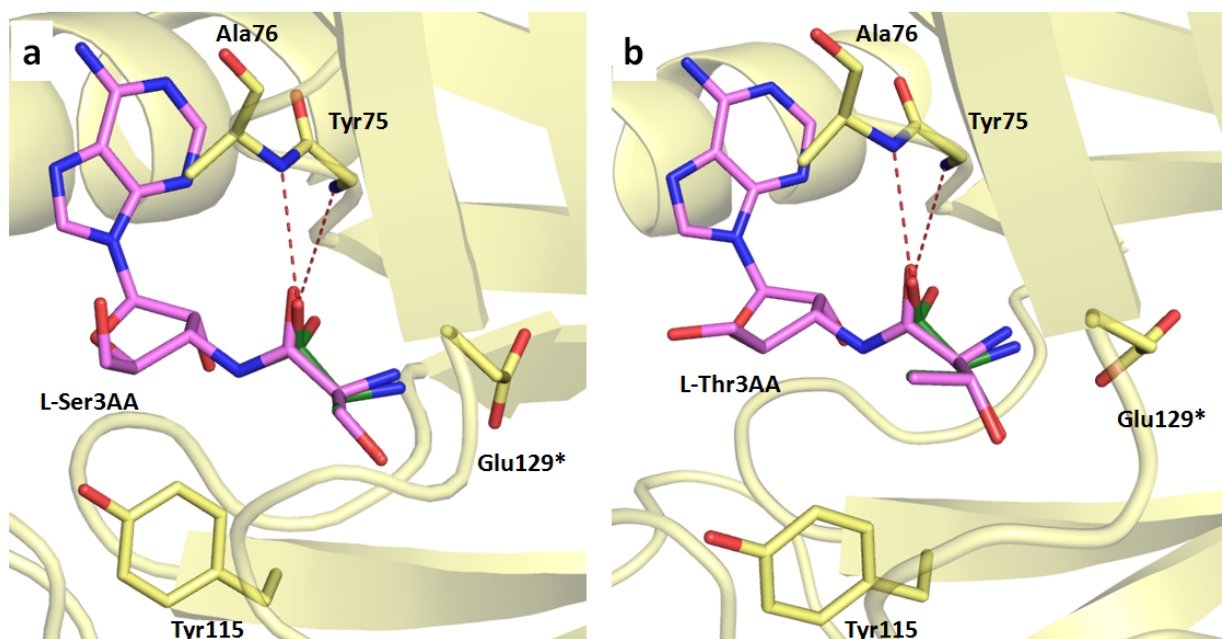

**Supplementary figure 9.** Modeling the oxyanion transition state (green) of (a) L-Ser-adenosine ester and (b) L-Thr-adenosine ester on the corresponding substrate analogs (pink) in the active site of ApNTD does not show any incompatibility in the case of L-Thr-adenosine ester.

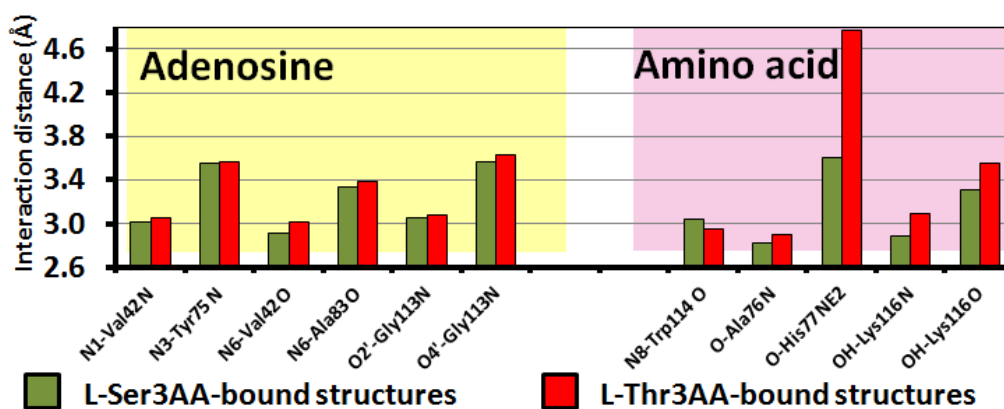

**Supplementary figure 10.** The interaction distances show a loosening of interactions of the threonyl moiety as observed earlier for the wild type.

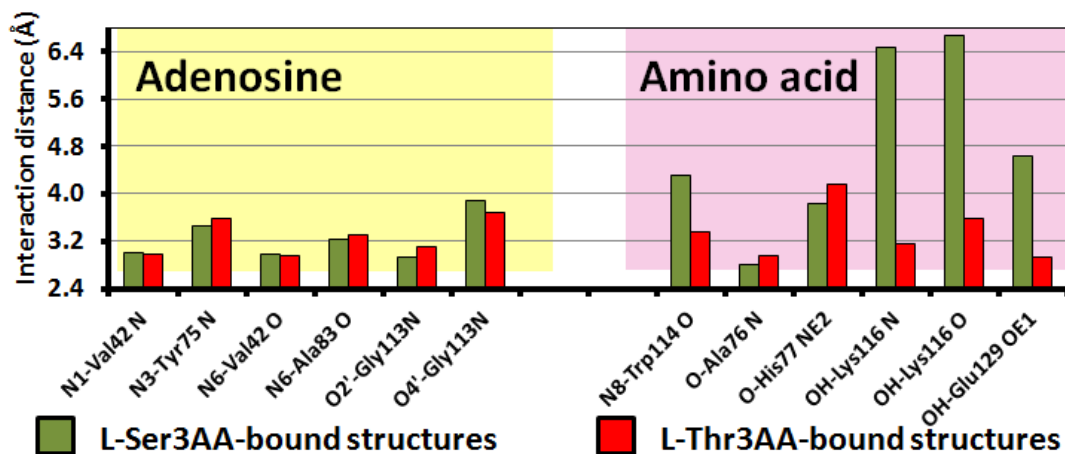

**Supplementary figure 11.** The interaction distances do not show any loosening of interactions of the threonyl moiety. Some interactions in the L-Ser3AA-bound structures are broken because the  $\beta$ -OH group of L-Ser3AA is oriented differently from that of L-Thr3AA.



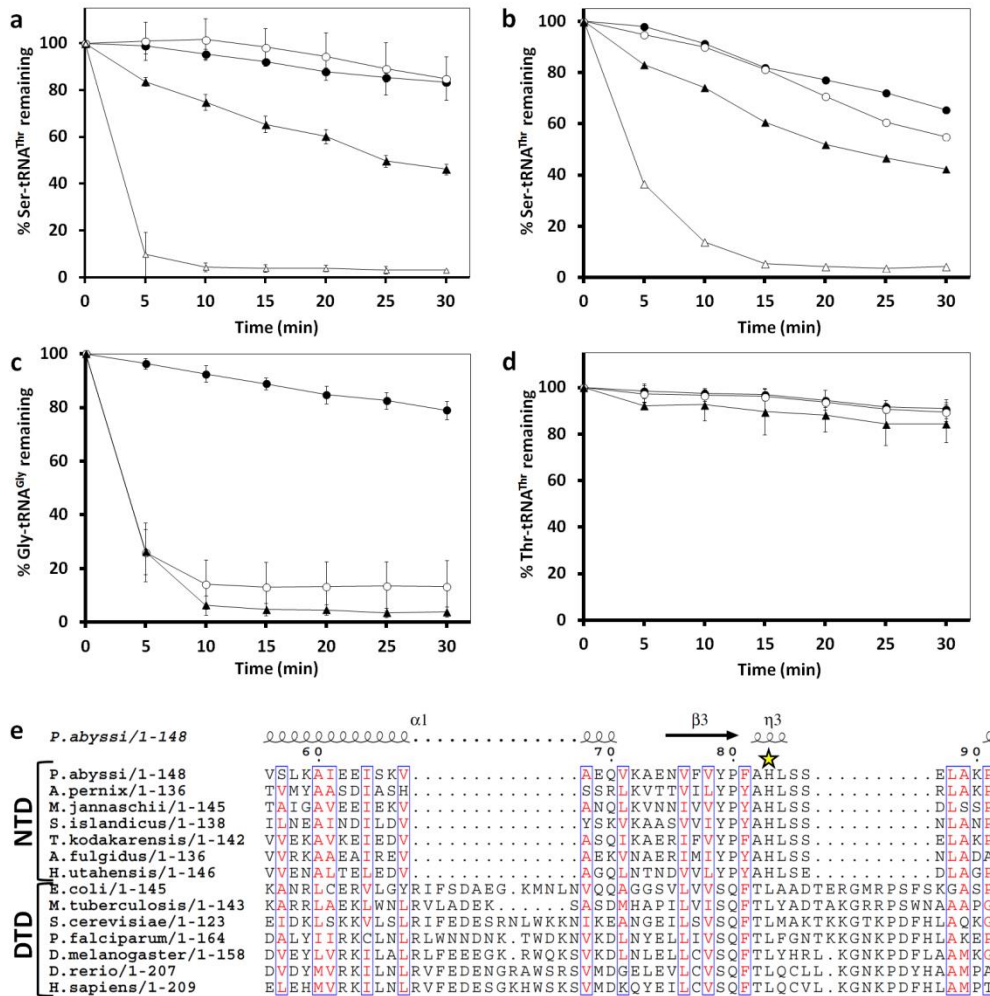

**Supplementary figure 12.** Evidence against the role of His83 in catalysis or substrate specificity. (a) Deacylation of L-Ser-(Ec)tRNA<sup>Thr</sup>, (b) Imidazole rescue assay in the presence of 0.1 M imidazole pH 7.0, (c) Deacylation of Gly-tRNA<sup>Gly</sup>, (d) Deacylation of L-Thr-(Ec)tRNA<sup>Thr</sup>. The representations used in all the plots are: buffer (closed circles), PabNTD H83A (open circles), ApNTD H77A (closed triangles) and ApNTD wild type (open triangles). The error bars indicate standard deviation of three independent experiments. (e) Structure-based multiple sequence alignment showing that His83 (marked by yellow star) is not conserved across the DTD-like fold. All deacylation experiments were done in triplicates except imidazole rescue assay which was done once.



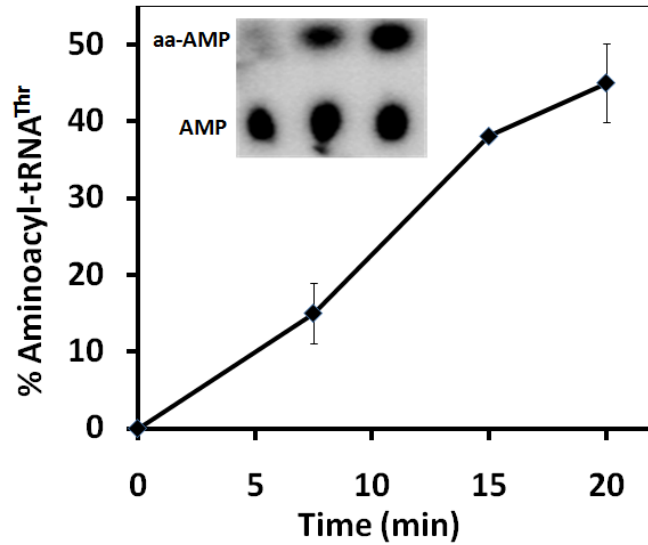

**Supplementary figure 14.** Percentage aminoacylation of (Ap)tRNA<sup>Thr</sup> with respect to time, along with a representative TLC after S1 digestion. The error bars indicate standard deviation of three independent experiments.

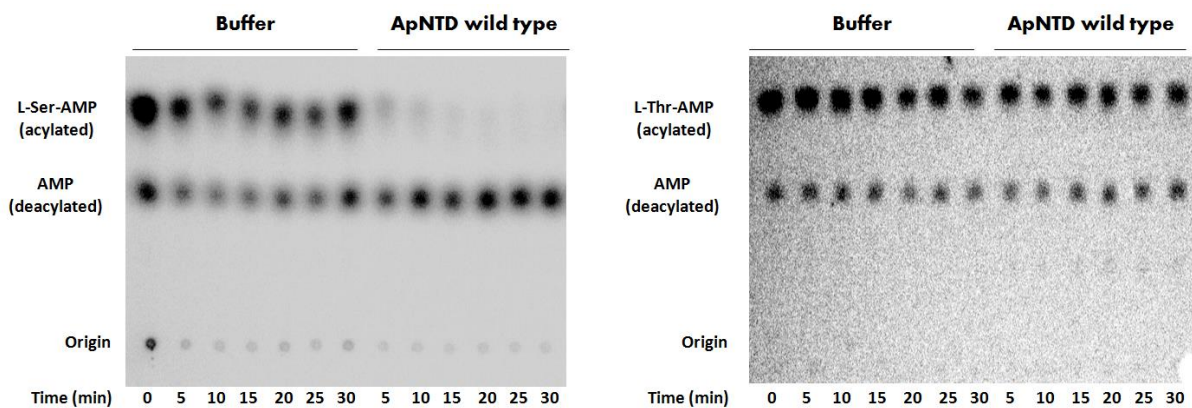

**Supplementary figure 15.** A representative TLC run showing aminoacyl-AMP and AMP after S1 nuclease digestion. Deacylation of L-Ser-tRNA<sup>Thr</sup> and L-Thr-tRNA<sup>Thr</sup> with ApNTD wild type. Substrate preparations contain at least 50% aminoacylated tRNA.

## Supplementary tables

**Supplementary table 1. All known mutations in proofreading domains that lead to deacylation of cognate aminoacyl-tRNA.**

| <b>Mutation(s)</b>               | <b>Editing domain</b>                     | <b>Organism</b>                  | <b>Site of mutation</b>               | <b>Reference</b> |
|----------------------------------|-------------------------------------------|----------------------------------|---------------------------------------|------------------|
| T233A<br>H319A                   | IleRS                                     | <i>Thermus<br/>thermophilus</i>  | Amino acid binding<br>pocket          | (2)              |
| T252A                            | LeuRS                                     | <i>Escherichia coli</i>          | Amino acid binding<br>pocket          | (3)              |
| H369A<br>H369C                   | ProRS INS<br>domain                       | <i>Escherichia coli</i>          | Putative amino acid<br>binding pocket | (4)              |
| L202A<br>S211A<br>D234A<br>T236A | PheRS                                     | <i>Pyrococcus<br/>horikoshii</i> | Amino acid binding<br>pocket          | (5)              |
| Q633M                            | AlaRS                                     | <i>Pyrococcus<br/>horikoshii</i> | Amino acid binding<br>pocket          | (6)              |
| Q584N                            | AlaRS                                     | <i>Escherichia coli</i>          | Amino acid binding<br>pocket          | (7)              |
| T30V                             | AlaX<br>( <i>trans</i> editing<br>domain) | <i>Pyrococcus<br/>horikoshii</i> | Amino acid binding<br>pocket          | (6)              |

**Supplementary table 2. Data collection and refinement statistics.**

|                                                        | ApNTD+<br>L-Ser3AA                       | ApNTD+<br>L-Thr3AA                       | MjNTD+<br>L-Ser3AA       | MjNTD+<br>L-Thr3AA       |
|--------------------------------------------------------|------------------------------------------|------------------------------------------|--------------------------|--------------------------|
| <b>Data collection</b>                                 |                                          |                                          |                          |                          |
| Space group                                            | <i>P</i> 4 <sub>1</sub> 2 <sub>1</sub> 2 | <i>P</i> 4 <sub>1</sub> 2 <sub>1</sub> 2 | <i>C</i> 2               | <i>P</i> 2 <sub>1</sub>  |
| Cell dimensions                                        |                                          |                                          |                          |                          |
| <i>a</i> , <i>b</i> , <i>c</i> (Å)                     | 46.9, 46.9, 112.7                        | 47.3, 47.3, 112.4                        | 159.6, 52.8, 98.3        | 36.6, 64.9, 97.8         |
| $\alpha$ , $\beta$ , $\gamma$ (°)                      | 90.0, 90.0, 90.0                         | 90.0, 90.0, 90.0                         | 90.0, 104.0, 90.0        | 90.0, 91.1, 90.0         |
| Resolution (Å)                                         | 25.0-1.88<br>(1.95-1.88)*                | 25.0-1.70<br>(1.76-1.70)                 | 25.0-1.70<br>(1.76-1.70) | 25.0-1.93<br>(2.00-1.93) |
| <i>R</i> <sub>merge</sub> (%)                          | 7.4 (60.5)                               | 6.5 (42.3)                               | 14.7 (63.4)              | 5.5 (19.1)               |
| <i>I</i> / $\sigma$ <i>I</i>                           | 21.7(2.2)                                | 38.3 (5.3)                               | 12.0 (2.3)               | 36.1 (7.6)               |
| Completeness (%)                                       | 100 (100)                                | 96.4 (99.8)                              | 91.0 (99.0)              | 99.3 (93.1)              |
| Redundancy                                             | 7.3 (6.8)                                | 10.6 (11.1)                              | 4.7 (4.6)                | 6.5 (5.8)                |
| <b>Refinement</b>                                      |                                          |                                          |                          |                          |
| Resolution (Å)                                         | 1.88                                     | 1.70                                     | 1.70                     | 1.93                     |
| No. reflections                                        | 10328                                    | 13567                                    | 75775                    | 32739                    |
| <i>R</i> <sub>work</sub> / <i>R</i> <sub>free</sub> ** | 0.18/0.22                                | 0.20/0.26                                | 0.19/0.24                | 0.19/0.23                |
| No. atoms                                              | 1246                                     | 1218                                     | 7221                     | 4724                     |
| Protein                                                | 1068                                     | 1068                                     | 6591                     | 4363                     |
| Ligand/ion                                             | 25/0                                     | 26/1                                     | 150/3                    | 78/0                     |
| Water                                                  | 153                                      | 123                                      | 477                      | 283                      |
| <i>B</i> -factors (Å <sup>2</sup> )                    | 27.9                                     | 26.7                                     | 27.1                     | 29.1                     |
| Protein                                                | 25.9                                     | 25.3                                     | 26.4                     | 28.2                     |
| Ligand/ion                                             | 21.7/ –                                  | 28.7/35.1                                | 27.4/30.5                | 33.3/ –                  |
| Water                                                  | 42.5                                     | 38.2                                     | 36.9                     | 40.4                     |
| R.m.s. deviations                                      |                                          |                                          |                          |                          |
| Bond lengths (Å)                                       | 0.016                                    | 0.016                                    | 0.015                    | 0.009                    |
| Bond angles (°)                                        | 1.621                                    | 1.864                                    | 1.782                    | 1.185                    |

\*Values in parentheses are for highest-resolution shell

\*\*Throughout the refinement, 5% of the total reflections were held aside for *R*<sub>free</sub>

**Supplementary table 3. Data collection and refinement statistics.**

|                                                        | <b>ApNTD+<br/>L-Ser3AA2</b>              | <b>ApNTD+<br/>L-Ser3AA3</b>              | <b>ApNTD+<br/>L-Ser3AA4</b>              |
|--------------------------------------------------------|------------------------------------------|------------------------------------------|------------------------------------------|
| <b>Data collection</b>                                 |                                          |                                          |                                          |
| Space group                                            | <i>P</i> 4 <sub>1</sub> 2 <sub>1</sub> 2 | <i>P</i> 4 <sub>1</sub> 2 <sub>1</sub> 2 | <i>P</i> 4 <sub>1</sub> 2 <sub>1</sub> 2 |
| Cell dimensions                                        |                                          |                                          |                                          |
| <i>a</i> , <i>b</i> , <i>c</i> (Å)                     | 47.9, 47.9, 114.7                        | 47.8, 47.8, 114.4                        | 47.9, 47.9, 113.7                        |
| $\alpha$ , $\beta$ , $\gamma$ (°)                      | 90.0, 90.0, 90.0                         | 90.0, 90.0, 90.0                         | 90.0, 90.0, 90.0                         |
| Resolution (Å)                                         | 25.0-1.86<br>(1.93-1.86)*                | 25.0-1.86<br>(1.93-1.86)                 | 25.0-1.66<br>(1.72-1.66)                 |
| <i>R</i> <sub>merge</sub> (%)                          | 4.4 (28.1)                               | 11.0 (44.2)                              | 6.0 (31.2)                               |
| <i>I</i> / $\sigma$ <i>I</i>                           | 56.6 (6.9)                               | 28.5(3.5)                                | 47.8 (4.7)                               |
| Completeness (%)                                       | 98.6 (95.7)                              | 99.7 (96.6)                              | 98.6 (85.7)                              |
| Redundancy                                             | 13.5 (12.7)                              | 19.2 (13.7)                              | 12.5 (8.3)                               |
| <b>Refinement</b>                                      |                                          |                                          |                                          |
| Resolution (Å)                                         | 1.86                                     | 1.86                                     | 1.67                                     |
| No. reflections                                        | 11129                                    | 11182                                    | 15270                                    |
| <i>R</i> <sub>work</sub> / <i>R</i> <sub>free</sub> ** | 0.19/0.24                                | 0.18/0.23                                | 0.19/0.22                                |
| No. atoms                                              | 1260                                     | 1264                                     | 1267                                     |
| Protein                                                | 1068                                     | 1068                                     | 1068                                     |
| Ligand/ion                                             | 25/1                                     | 25/1                                     | 25/1                                     |
| Water                                                  | 166                                      | 170                                      | 173                                      |
| <i>B</i> -factors (Å <sup>2</sup> )                    |                                          |                                          |                                          |
| Protein                                                | 27.4                                     | 27.6                                     | 26.3                                     |
| Ligand/ion                                             | 26.1                                     | 26.2                                     | 24.5                                     |
| Water                                                  | 22.8/67.1                                | 27.6/46.8                                | 25.3/32.6                                |
| R.m.s. deviations                                      |                                          |                                          |                                          |
| Bond lengths (Å)                                       | 40.8                                     | 41.2                                     | 38.9                                     |
| Bond angles (°)                                        | 0.013                                    | 0.013                                    | 0.017                                    |
|                                                        | 1.654                                    | 1.633                                    | 1.965                                    |

\*Values in parentheses are for highest-resolution shell

\*\*Throughout the refinement, 5% of the total reflections were held aside for *R*<sub>free</sub>

**Supplementary table 4. Data collection and refinement statistics.**

|                                                        | <b>ApNTD+<br/>L-Thr3AA2</b>              | <b>ApNTD+<br/>L-Thr3AA3</b>              | <b>ApNTD+<br/>L-Thr3AA4</b>              |
|--------------------------------------------------------|------------------------------------------|------------------------------------------|------------------------------------------|
| <b>Data collection</b>                                 |                                          |                                          |                                          |
| Space group                                            | <i>P</i> 4 <sub>1</sub> 2 <sub>1</sub> 2 | <i>P</i> 4 <sub>1</sub> 2 <sub>1</sub> 2 | <i>P</i> 4 <sub>1</sub> 2 <sub>1</sub> 2 |
| Cell dimensions                                        |                                          |                                          |                                          |
| <i>a</i> , <i>b</i> , <i>c</i> (Å)                     | 47.1, 47.1, 112.7                        | 48.8, 48.8, 114.7                        | 47.5, 47.5, 113.6                        |
| $\alpha$ , $\beta$ , $\gamma$ (°)                      | 90.0, 90.0, 90.0                         | 90.0, 90.0, 90.0                         | 90.0, 90.0, 90.0                         |
| Resolution (Å)                                         | 25.0-2.10<br>(2.18-2.10)*                | 25.0-1.86<br>(1.93-1.86)                 | 25.0-1.86<br>(1.93-1.86)                 |
| <i>R</i> <sub>merge</sub> (%)                          | 6.3 (34.8)                               | 4.6 (21.0)                               | 4.6 (33.2)                               |
| <i>I</i> / $\sigma$ <i>I</i>                           | 19.6 (3.3)                               | 52.9(9.7)                                | 50.8 (5.0)                               |
| Completeness (%)                                       | 94.0 (97.5)                              | 99.8 (99.5)                              | 99.8 (97.6)                              |
| Redundancy                                             | 6.3 (5.6)                                | 13.3 (12.8)                              | 12.8 (11.4)                              |
| <b>Refinement</b>                                      |                                          |                                          |                                          |
| Resolution (Å)                                         | 2.10                                     | 1.86                                     | 1.86                                     |
| No. reflections                                        | 7137                                     | 11646                                    | 11005                                    |
| <i>R</i> <sub>work</sub> / <i>R</i> <sub>free</sub> ** | 0.21/0.27                                | 0.19/0.25                                | 0.18/0.22                                |
| No. atoms                                              | 1177                                     | 1315                                     | 1287                                     |
| Protein                                                | 1068                                     | 1068                                     | 1068                                     |
| Ligand/ion                                             | 26/0                                     | 26/0                                     | 26/1                                     |
| Water                                                  | 83                                       | 221                                      | 192                                      |
| <i>B</i> -factors (Å <sup>2</sup> )                    | 32.6                                     | 22.9                                     | 27.2                                     |
| Protein                                                | 32.0                                     | 20.2                                     | 25.0                                     |
| Ligand/ion                                             | 34.3/ –                                  | 24.9/ –                                  | 30.6/32.1                                |
| Water                                                  | 40.1                                     | 35.9                                     | 39.1                                     |
| R.m.s. deviations                                      |                                          |                                          |                                          |
| Bond lengths (Å)                                       | 0.012                                    | 0.011                                    | 0.017                                    |
| Bond angles (°)                                        | 1.432                                    | 1.459                                    | 1.924                                    |

\*Values in parentheses are for highest-resolution shell

\*\*Throughout the refinement, 5% of the total reflections were held aside for *R*<sub>free</sub>

**Supplementary table 5. Data collection and refinement statistics.**

|                                                        | ApNTD E129A+<br>L-Ser3AA                 | ApNTD E129A+<br>L-Thr3AA                 | ApNTD Y115A+<br>L-Ser3AA                 | ApNTD Y115A+<br>L-Thr3AA                 |
|--------------------------------------------------------|------------------------------------------|------------------------------------------|------------------------------------------|------------------------------------------|
| <b>Data collection</b>                                 |                                          |                                          |                                          |                                          |
| Space group                                            | <i>P</i> 4 <sub>1</sub> 2 <sub>1</sub> 2 | <i>P</i> 4 <sub>1</sub> 2 <sub>1</sub> 2 | <i>P</i> 4 <sub>1</sub> 2 <sub>1</sub> 2 | <i>P</i> 4 <sub>1</sub> 2 <sub>1</sub> 2 |
| Cell dimensions                                        |                                          |                                          |                                          |                                          |
| <i>a</i> , <i>b</i> , <i>c</i> (Å)                     | 47.0, 47.0, 112.5                        | 47.1, 47.1, 112.7                        | 47.7, 47.7, 113.1                        | 47.9, 47.9, 114.4                        |
| $\alpha$ , $\beta$ , $\gamma$ (°)                      | 90.0, 90.0, 90.0                         | 90.0, 90.0, 90.0                         | 90.0, 90.0, 90.0                         | 90.0, 90.0, 90.0                         |
| Resolution (Å)                                         | 25.0-1.96<br>(2.03-1.96)*                | 25.0-1.55<br>(1.61-1.55)                 | 25.0-1.86<br>(1.93-1.86)                 | 25.0-1.86<br>(1.93-1.86)                 |
| <i>R</i> <sub>merge</sub> (%)                          | 7.0 (57.0)                               | 9.2 (26.3)                               | 12.5 (73.1)                              | 4.3 (20.9)                               |
| <i>I</i> / $\sigma$ <i>I</i>                           | 23.2 (2.0)                               | 32.4 (7.3)                               | 13.6 (2.1)                               | 49.1 (8.9)                               |
| Completeness (%)                                       | 97.4 (87.8)                              | 99.3 (96.4)                              | 99.2 (99.7)                              | 99.7 (98.3)                              |
| Redundancy                                             | 6.8 (5.8)                                | 13.9 (7.5)                               | 12.8 (11.4)                              | 13.9 (12.6)                              |
| <b>Refinement</b>                                      |                                          |                                          |                                          |                                          |
| Resolution (Å)                                         | 1.97                                     | 1.55                                     | 1.86                                     | 1.86                                     |
| No. reflections                                        | 8950                                     | 18120                                    | 10905                                    | 11276                                    |
| <i>R</i> <sub>work</sub> / <i>R</i> <sub>free</sub> ** | 0.18/0.24                                | 0.19/0.26                                | 0.19/0.23                                | 0.18/0.22                                |
| No. atoms                                              | 1161                                     | 1238                                     | 1230                                     | 1215                                     |
| Protein                                                | 1060                                     | 1064                                     | 1061                                     | 1061                                     |
| Ligand/ion                                             | 25/0                                     | 26/2                                     | 25/0                                     | 26/1                                     |
| Water                                                  | 76                                       | 146                                      | 144                                      | 127                                      |
| <i>B</i> -factors (Å <sup>2</sup> )                    | 36.4                                     | 20.9                                     | 35.5                                     | 21.4                                     |
| Protein                                                | 35.8                                     | 19.3                                     | 34.1                                     | 20.1                                     |
| Ligand/ion                                             | 29.3/ –                                  | 16.9/25.2                                | 35.1/ –                                  | 19.9/26.0                                |
| Water                                                  | 46.4                                     | 33.5                                     | 46.4                                     | 32.7                                     |
| R.m.s. deviations                                      |                                          |                                          |                                          |                                          |
| Bond lengths (Å)                                       | 0.016                                    | 0.015                                    | 0.013                                    | 0.010                                    |
| Bond angles (°)                                        | 1.656                                    | 1.744                                    | 1.717                                    | 1.409                                    |

\*Values in parentheses are for highest-resolution shell

\*\*Throughout the refinement, 5% of the total reflections were held aside for *R*<sub>free</sub>



**Supplementary table 6. Data collection and refinement statistics.**

|                                                        | <b>PabNTD<br/>K121M+<br/>L-Ser3AA</b>                        | <b>PabNTD<br/>K121M+<br/>L-Thr3AA</b>                        | <b>ApNTD<br/>K116M+<br/>L-Ser3AA</b>                         | <b>ApNTD<br/>K116M+<br/>L-Thr3AA</b>                         |
|--------------------------------------------------------|--------------------------------------------------------------|--------------------------------------------------------------|--------------------------------------------------------------|--------------------------------------------------------------|
| <b>Data collection</b>                                 |                                                              |                                                              |                                                              |                                                              |
| Space group                                            | <i>P</i> <sub>2</sub> <sub>1</sub> <sub>2</sub> <sub>1</sub> | <i>P</i> <sub>2</sub> <sub>1</sub> <sub>2</sub> <sub>1</sub> | <i>P</i> <sub>4</sub> <sub>1</sub> <sub>2</sub> <sub>1</sub> | <i>P</i> <sub>4</sub> <sub>1</sub> <sub>2</sub> <sub>1</sub> |
| Cell dimensions                                        |                                                              |                                                              |                                                              |                                                              |
| <i>a</i> , <i>b</i> , <i>c</i> (Å)                     | 40.6, 74.6, 96.3                                             | 38.6, 66.3, 93.7                                             | 47.2, 47.2, 113.0                                            | 47.1, 47.1, 113.1                                            |
| $\alpha$ , $\beta$ , $\gamma$ (°)                      | 90.0, 90.0, 90.0                                             | 90.0, 90.0, 90.0                                             | 90.0, 90.0, 90.0                                             | 90.0, 90.0, 90.0                                             |
| Resolution (Å)                                         | 25.0 – 1.79<br>(1.85 - 1.79)*                                | 25.0 – 1.86<br>(1.93 - 1.86)                                 | 25.0-1.55<br>(1.61-1.55)                                     | 25.0-1.50<br>(1.55-1.50)                                     |
| <i>R</i> <sub>merge</sub> (%)                          | 4.0 (17.4)                                                   | 6.9 (17.1)                                                   | 6.8 (25.2)                                                   | 13.6 (47.0)                                                  |
| <i>I</i> / $\sigma$ <i>I</i>                           | 50.0 (6.9)                                                   | 26.3 (7.6)                                                   | 39.2 (11.6)                                                  | 20.0(4.5)                                                    |
| Completeness (%)                                       | 97.2 (86.1)                                                  | 99.1 (96.0)                                                  | 92.7 (89.5)                                                  | 99.3 (98.3)                                                  |
| Redundancy                                             | 5.7 (5.2)                                                    | 4.8 (4.5)                                                    | 14.1 (16.0)                                                  | 13.7 (9.0)                                                   |
| <b>Refinement</b>                                      |                                                              |                                                              |                                                              |                                                              |
| Resolution (Å)                                         | 1.79                                                         | 1.86                                                         | 1.55                                                         | 1.50                                                         |
| No. reflections                                        | 27566                                                        | 20636                                                        | 17012                                                        | 19968                                                        |
| <i>R</i> <sub>work</sub> / <i>R</i> <sub>free</sub> ** | 0.21/0.24                                                    | 0.20/0.23                                                    | 0.20/0.23                                                    | 0.19/0.26                                                    |
| No. atoms                                              | 2556                                                         | 2528                                                         | 1212                                                         | 1195                                                         |
| Protein                                                | 2225                                                         | 2267                                                         | 1067                                                         | 1067                                                         |
| Ligand/ion                                             | 50/0                                                         | 52/0                                                         | 25/1                                                         | 26/1                                                         |
| Water                                                  | 281                                                          | 209                                                          | 119                                                          | 101                                                          |
| <i>B</i> -factors (Å <sup>2</sup> )                    | 19.1                                                         | 25.7                                                         | 18.7                                                         | 22.5                                                         |
| Protein                                                | 18.1                                                         | 25.0                                                         | 17.6                                                         | 21.5                                                         |
| Ligand/ion                                             | 15.2/–                                                       | 19.2/–                                                       | 18.4/21.8                                                    | 20.0/26.8                                                    |
| Water                                                  | 27.4                                                         | 35.0                                                         | 29.0                                                         | 33.2                                                         |
| R.m.s. deviations                                      |                                                              |                                                              |                                                              |                                                              |
| Bond lengths (Å)                                       | 0.005                                                        | 0.005                                                        | 0.016                                                        | 0.018                                                        |
| Bond angles (°)                                        | 1.36                                                         | 1.39                                                         | 1.84                                                         | 1.94                                                         |

\*Values in parentheses are for highest-resolution shell

\*\*Throughout the refinement, 5% of the total reflections were held aside for *R*<sub>free</sub>

## Supplementary References

1. Hussain, T., Kamarthapu, V., Kruparani, S.P., Deshmukh, M.V. & Sankaranarayanan, R. Mechanistic insights into cognate substrate discrimination during proofreading in translation. *Proc. Natl. Acad. Sci. USA* **107**, 22117–221121 (2010).
2. Fukunaga, R. & Yokoyama, S. Structural basis for substrate recognition by the editing domain of isoleucyl-tRNA synthetase. *J. Mol. Biol.* **359**, 901–912 (2006).
3. Mursinna, R.S., Lincecum, T.L., Jr. & Martinis, S.A. A conserved threonine within *Escherichia coli* leucyl-tRNA synthetase prevents hydrolytic editing of leucyl-tRNA<sup>Leu</sup>. *Biochemistry* **40**, 5376–5381 (2001).
4. Wong, F.C., Beuning, P.J., Nagan, M., Shiba, K. & Musier-Forsyth, K. Functional role of the prokaryotic proline-tRNA synthetase insertion domain in amino acid editing. *Biochemistry* **41**, 7108–7115 (2002).
5. Sasaki, H.M. et al. Structural and mutational studies of the amino acid-editing domain from archaeal/eukaryal phenylalanyl-tRNA synthetase. *Proc. Natl. Acad. Sci. USA* **103**, 14744–14749 (2006).
6. Sokabe, M., Okada, A., Yao, M., Nakashima, T. & Tanaka, I. Molecular basis of alanine discrimination in editing site. *Proc. Natl. Acad. Sci. USA* **102**, 11669–11674 (2005).
7. Pasma, Z. et al. Substrate specificity and catalysis by the editing active site of Alanine-tRNA synthetase from *Escherichia coli*. *Biochemistry* **50**, 1474–1482 (2011).
